# Supplementary material
Source: PubMed Central journal article supplement (PMC2041984)
Supplement: pgen.0030166.sg003.pdf [file pgen.0030166.sg003.pdf]

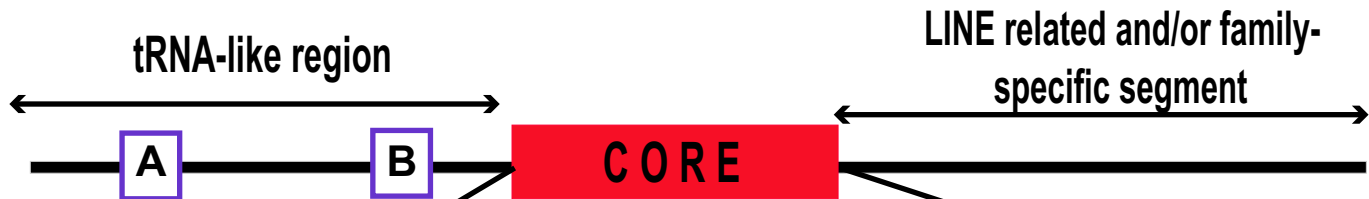

Sequence alignment of various LINE elements, showing conserved regions marked with asterisks (\*) and positions 20, 40, and 60. The alignment is as follows:

```

nPE2 opo: --AAAGCAAT-TAAAACCCCTTCA--AAGGTCATTGAAACCTCTTTGCTTCTAATTCCC--TTTGCAATTGAT : 69
nPE2 wal: --AAAGCAAT-TAAAACCCCTTCA--AAGGTCATTGAAATCTCTTTGCTTTCATTCCC--TTCGTAATTGAT : 69
MAR1 nest: --AAAGAAATGGCAAACCCCTTCAATGTC-TCTTTTAAACCTTGTTTGCCTCAGTTTCCTCCTTTGTCAATTGAG : 73
MAR1 MD: -----CTAGCTGTGTGACCCCTGGGCAAG-TCACCTT-AACCCTGTTTGCCTCAGTTTCCTCATCTGTAAATGAG : 67
MAR1a MD: -----CTAGCTGTGTGACCTTGGGCAAG-TCACCTTAAAC-CTCTTTGCTTCCATTTCCCTCATCTGTAAATGAT : 67
MAR1b MD: ACACCTTACTAGCTGTGTGACCCCTGGGCAAG-TCACCTTAAACCTCTGTTTGCCTTAAT--CCA---CTGGAGAGGGAA : 70
Ther1: ACACCTTACTAGCTGTGTGACCCCTGGGCAAG-TCACCTTAAACCTCTGTCTGCCTCAGTTTCCTCATCTGTAAATGGG : 75
Ther2: ACACCTTACTACCTGTGTGACCTTGGGCAAG-TCACCTTAAACCTCTCTGGGCCTCAGTTTCCTCATCTGTAAATGAA : 75
Mon1: CCACCTTGTCTGCTGTGTGACCTTGGGCAAG-TCACCTTAACTTCTCTGTGCCTCAGTTACCTCATCTGTAAATGGG : 75
MIR: CCACCTTACTAGCTGTGTGACCTTGGGCAAG-TTACTTAAACCTCTCTGTGCCTCAGTTTCCTCATCTGTAAATGGG : 75
  
```
