# Supplementary material
Source: PubMed Central journal article supplement (PMC2041984)
Supplement: pgen.0030166.sg004.pdf [file pgen.0030166.sg004.pdf]

**A**

```

MAR1_MD_CoreCore : AGCTGTGTGACCC--TGGCAAGTCACTTAAACCTGTTGGCCTCAGTTTCCTCATCTGTAAA--TGAGCT----- : 67
chr1: 671791460-671791681 : AGCTGTGTGACCC--TGAATAAGTCACTTCAACCTGTTGGCCTCAGTTTCCTCATCTGTAAA--TGAGCTCGAGRAGCAANTAGCAAAACC : 87
chr1: 671791617-671791838 : AGCTGTGTGACCC--TGAATAAGTCACTTCAACCTGTTGGCCTCAGTTTCCTCATCTGTAAA--TGAGCTCGAGRAGCAANTAGCAAAACC : 87
chr1: 671791774-671791995 : AGCTGTGTGACCC--TGAATAAGTCACTTCAACCTGTTGGCCTCAGTTTCCTCATCTGTAAA--TGAGCTCGAGRAGCAANTAGCAAAACC : 87
chr1: 671791931-671792152 : AGCTGTGTGACCC--TGAATAAGTCACTTCAACCTGTTGGCCTCAGTTTCCTCATCTGTAAA--TGAGCTCGAGRAGCAANTAGCAAAACC : 87
chr1: 671792088-671792309 : AGCTGTGTGACCC--TGAATAAGTCACTTCAACCTGTTGGCCTCAGTTTCCTCATCTGTAAA--TGAGCTCGAGRAGCAANTAGCAAAACC : 87
chr1: 671792245-671792466 : AGCTGTGTGACCC--TGAATAAGTCACTTCAACCTGTTGGCCTCAGTTTCCTCATCTGTAAA--TGAGCTCGAGRAGCAANTAGCAAAACC : 87
chr2: 12583283-12583440 : -----TGACCC--TGGCAAGTCACTTCACTTCTGTTGGCCTCAGTTTCCTCATCTGTAAA--TGAGACAGAGRAGCAANTAGCAAAACC : 80
chr3: 496000498-496000656 : AGCTGTGTGACCC--TGCRAAGTCACTTCAACCTGTTGGCCTCAGTTTCCTCATCTGTAAAAGTGAATTCAGRAGCAANTAG--AAACC : 86
chr3: 496001488-496001646 : AGCTGTGTGACCC--TGCRAAGTCACTTCAACCTGTTGGCCTCAGTTTCCTCATCTGTAAAAGTGAATTCAGRAGCAANTAG--AAACC : 86
chr3: 496001587-496001745 : AGCTGTATGACCC--TGCRAAGTCACTTCAACCTGTTGGCCTCAGTTTCCTCATCTGTAAAAGTGAATTCAGRAGCAANTAG--AAACC : 86
chr3: 496002082-496002240 : AGCTGTGTGACCC--TGCRAAGTCACTTCAACCTGTTGGCCTCAGTTTCCTCATCTGTAAAAGTGAATTCAGRAGCAANTAG--AAACC : 86
chr3: 496002181-496002339 : AGCTGTGTGACCC--TGCRAAGTCACTTCAACCTGTTGGCCTCAGTTTCCTCATCTGTAAAAGTGAATTCAGRAGCAANTAG--AAACC : 86
chr3: 504312297-504312525 : AGCTGTGTGACCC--TGCRAAGTCACTTCAACCTGTTGGCCTCAGTTTCCTCATCTGTAAAAGTGAATTCAGRAGCAANTAG--AAACC : 86
chr3: 509568403-509568626 : AATGCCAAACCCCTTCAGTATCTCATTTATCTGTTGGCCTCAGTTTCCTCATCTGTAAAAGTGAATTCAGRAGCAANTAG--AAACC : 89
chr3: 523026381-523026545 : AGCTGTGTGACCC--TGGCAAGTCACTTCAACCTGTTGGCCTCAGTTTCCTCATCTGTAAA--TGAGCTCGAGRAGCAANTAGCAAAACC : 87
chr3: 523036461-523036625 : -GCTGTGTGACCC--TGGCAAGTCACTTCAACCTGTTGGCCTCAGTTTCCTCATCTGTAAA--TGAGCTCGAGRAGCAANTAGCAAAACC : 86
chr4: 347585012-347585175 : AGCTGTGTGACCT--TGAATAAGTCACTTCAACCTGTTGGCCTCAGTTTCCTCATCTGTAAA--TGAGCTCGAGRAGCAANTAGCAAAACC : 86
chr8: 274249578-274249705 : AGCTGTGTGACCT--TGGCAAGTCACTTCAACCTGTTGGCCTCAGTTTCCTCATCTGTAAA--TGAGCC----- : 67

```

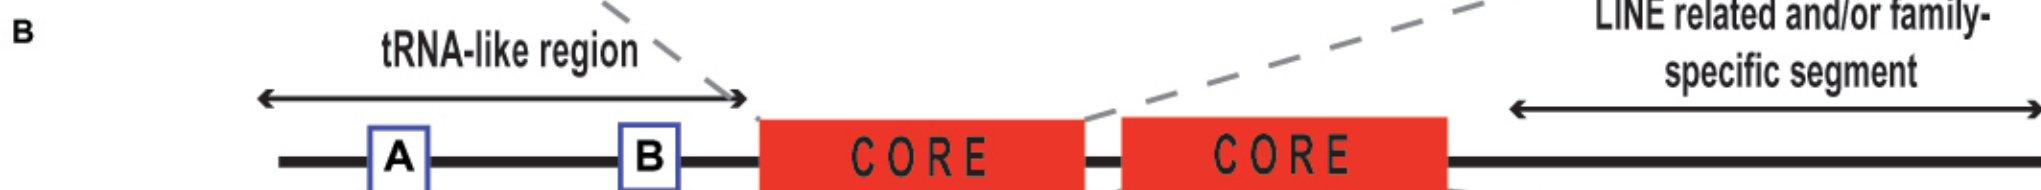

**C**

```

MAR1_MD_CoreCore : -----AGCTGTGTGACCCCTGGCAAGTCACTTAAACCTGTTGGCCTCAGTTTCCTCATCTGTAAA--TGAGCT----- : 132
chr1: 671791460-671791681 : ACT-CCAAATATTTTGC~TTTGTAGCTGTGTGACCCCTGAGTAAGTCACTTC-ACCCTGTTGGCCTCAGTTTCCTCATCTGTAAA--TGAGCT----- : 174
chr1: 671791617-671791838 : ACT-CCAAATATTTTGC~TTTGTAGCTGTGTGACCCCTGAGTAAGTCACTTC-ACCCTGTTGGCCTCAGTTTCCTCATCTGTAAA--TGAGCT----- : 174
chr1: 671791774-671791995 : ACT-CCAAATATTTTGC~TTTGTAGCTGTGTGACCCCTGAGTAAGTCACTTC-ACCCTGTTGGCCTCAGTTTCCTCATCTGTAAA--TGAGCT----- : 174
chr1: 671791931-671792152 : ACT-CCAAATATTTTGC~TTTGTAGCTGTGTGACCCCTGAGTAAGTCACTTC-ACCCTGTTGGCCTCAGTTTCCTCATCTGTAAA--TGAGCT----- : 174
chr1: 671792088-671792309 : ACT-CCAAATATTTTGC~TTTGTAGCTGTGTGACCCCTGAGTAAGTCACTTC-ACCCTGTTGGCCTCAGTTTCCTCATCTGTAAA--TGAGCT----- : 174
chr1: 671792245-671792466 : ACT-CCAAATATTTTGC~TTTGTAGCTGTGTGACCCCTGAGTAAGTCACTTC-ACCCTGTTGGCCTCAGTTTCCTCATCTGTAAA--TGAGCT----- : 174
chr2: 12583283-12583440 : AGT-CTAAATATTT-----ATTCTGTGACCCCTGGCAAGTCACTTC-ACCCTGTTGGCCTCAGTTTCCTCATCTGTAAA--TGAGCT----- : 157
chr3: 496000498-496000656 : ACT-CCAAATATTT-----AGCTGTGTGACCCCTG-CAAGTCACTTC-ACCCTGTTGGCCTCAGTTTCCTCATCTGTAAA--TGAGCT----- : 154
chr3: 496001488-496001646 : ACT-CCAAATATTT-----AGCTGTGTGACCCCTG-CAAGTCACTTC-ACCCTGTTGGCCTCAGTTTCCTCATCTGTAAA--TGAGCT----- : 158
chr3: 496001587-496001745 : ACT-CCAAATATTT-----AGCTGTGTGACCCCTG-CAAGTCACTTC-ACCCTGTTGGCCTCAGTTTCCTCATCTGTAAA--TGAGCT----- : 158
chr3: 496002082-496002240 : ACT-CCAAATATTT-----AGCTGTGTGACCCCTG-CAAGTCACTTC-ACCCTGTTGGCCTCAGTTTCCTCATCTGTAAA--TGAGCT----- : 158
chr3: 496002181-496002339 : ACT-CCAAATATTT-----AGCTGTGTGACCCCTG-CAAGTCACTTC-ACCCTGTTGGCCTCAGTTTCCTCATCTGTAAA--TGAGCT----- : 158
chr3: 504312297-504312525 : -----AGCTGTGTGACCCCTGGCAAGTCACTTAAACCTGTTGGCCTCAGTTTCCTCATCTGTAAA--TGAGCT----- : 147
chr3: 509568403-509568626 : -----CAATACAGTGTCTCATTTAAACCTGTTGGCCTCAGTTTCCTCATCTGTAAA--TGAGCT----- : 14

```
