# Supplementary material
Source: PubMed Central journal article supplement (PMC2041984)

10X

40X

WT  
nPE2

wt-B15

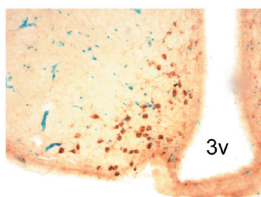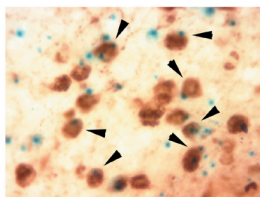

wt-26

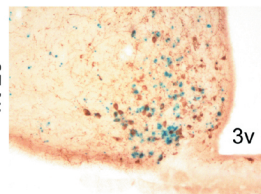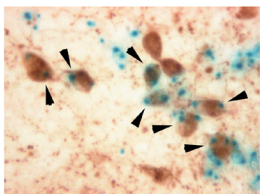 $\Delta$ 1  
nPE2 $\Delta$ 1-11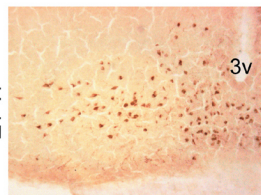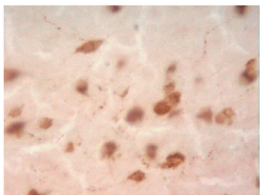 $\Delta$ 2  
nPE2 $\Delta$ 2-66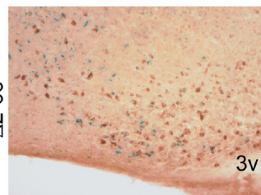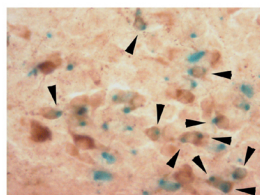 $\Delta$ 4  
nPE2 $\Delta$ 4-4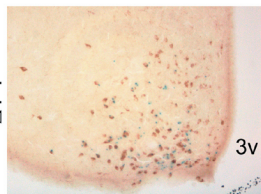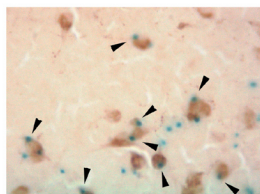 $\Delta$ 4-41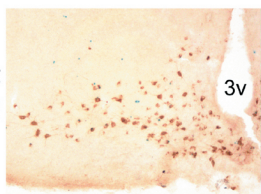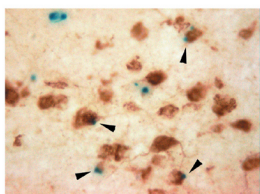 $\Delta$ 5-23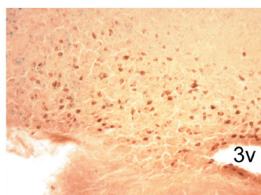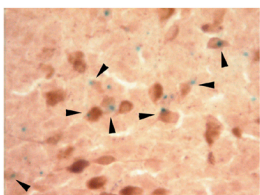 $\Delta$ 5  
nPE2 $\Delta$ 5-25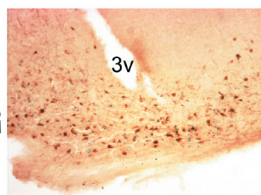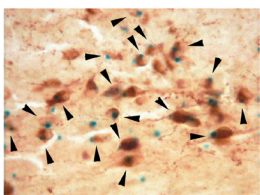 $\Delta$ 5-52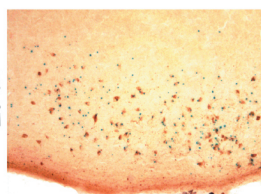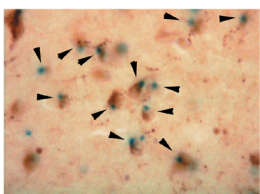

Supplement: pgen.0030166.sg001.pdf [file pgen.0030166.sg001.pdf]

10x

40x

$\Delta 1$  nPE2  
( $\Delta 1-12$ )

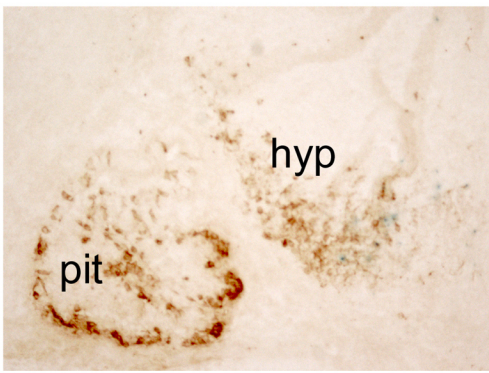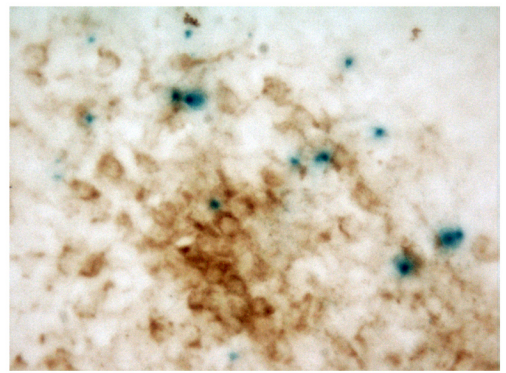

$\Delta 2$  nPE2  
( $\Delta 2-71$ )

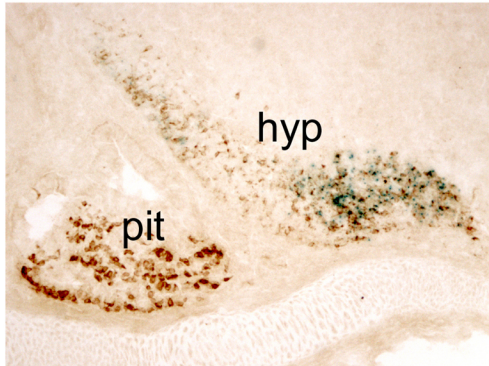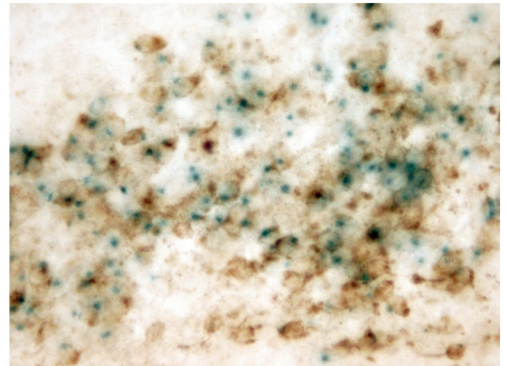

$\Delta 3$  nPE2  
( $\Delta 3-31$ )

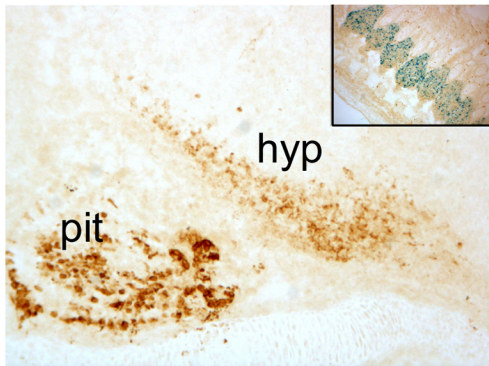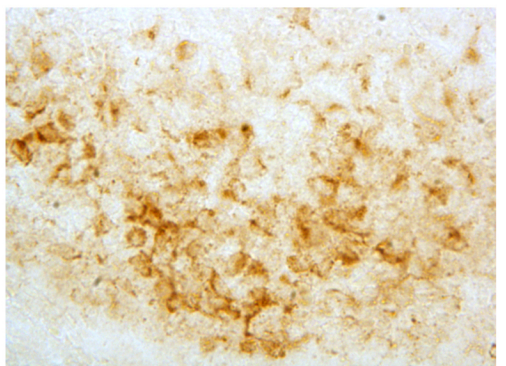

$\Delta 4$  nPE2  
( $\Delta 4-74$ )

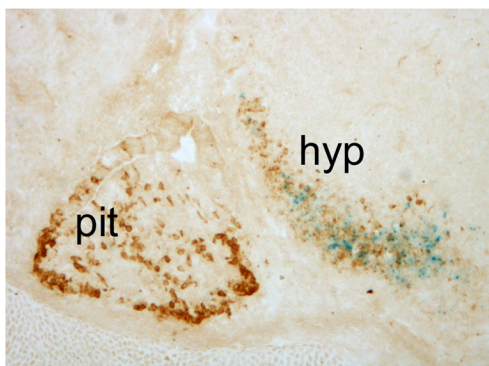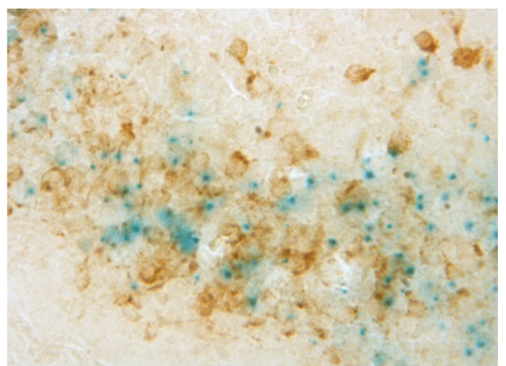

$\Delta 5$  nPE2  
( $\Delta 5-30$ )

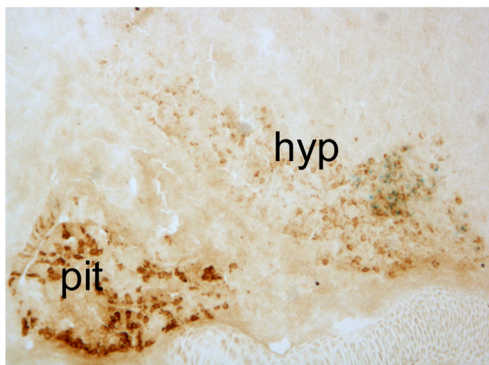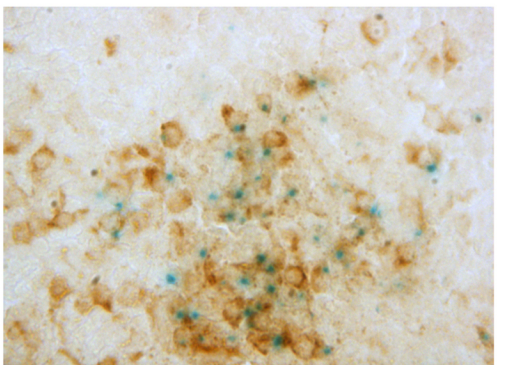

Supplement: pgen.0030166.sg002.pdf [file pgen.0030166.sg002.pdf]
